# Supplementary material for: Silica-coated LiYF4:Yb3+, Tm3+ upconverting nanoparticles are non-toxic and activate minor stress responses in mammalian cells
Source: Royal Society of Chemistry journal article supplement (doi:10.1039/d3ra08869c), 2024-01-01

## Supplementary Material

### **Silica-coated $\text{LiYF}_4:\text{Yb}^{3+},\text{Tm}^{3+}$ upconverting nanoparticles are non-toxic and activate minor stress responses in mammalian cells**

Kais Bietar<sup>1</sup>, Siwei Chu<sup>1</sup>, Gabrielle Mandl<sup>2</sup>, Emma Zhang<sup>1</sup>, Naim Chabaytah<sup>1</sup>, Renata Sabelli<sup>1</sup>, John A. Capobianco<sup>2\*</sup>, and Ursula Stochaj<sup>1,3\*</sup>

<sup>1</sup>Department of Physiology, McGill University, <sup>2</sup>Department of Chemistry and Biochemistry & Centre for Nanoscience Research, Concordia University, <sup>3</sup>Quantitative Life Sciences Program, McGill University, Montreal, Canada

\* Corresponding authors

**Figure S1.** Physicochemical properties of UCNPs used in this study.

**Figure S2.** Cell viability after incubation with UCNPs for 3 and 5 days.

**Figure S3.** Loss of PARP1 following endoplasmic reticulum stress.

**Figure S4.** Imaging of control samples incubated without UCNPs.

**Figure S5.** Impact of UCNPS on cell area, nuclear area, and the ratio nuclear area/cytoplasmic area.

**Figure S6.** Derailment of cellular homeostasis by established stressors.

**Figure S7.** NF $\kappa$ B accumulation in the nuclei of DTT-treated LLC-PK1 cells.

**Raw data files for Western blots.**

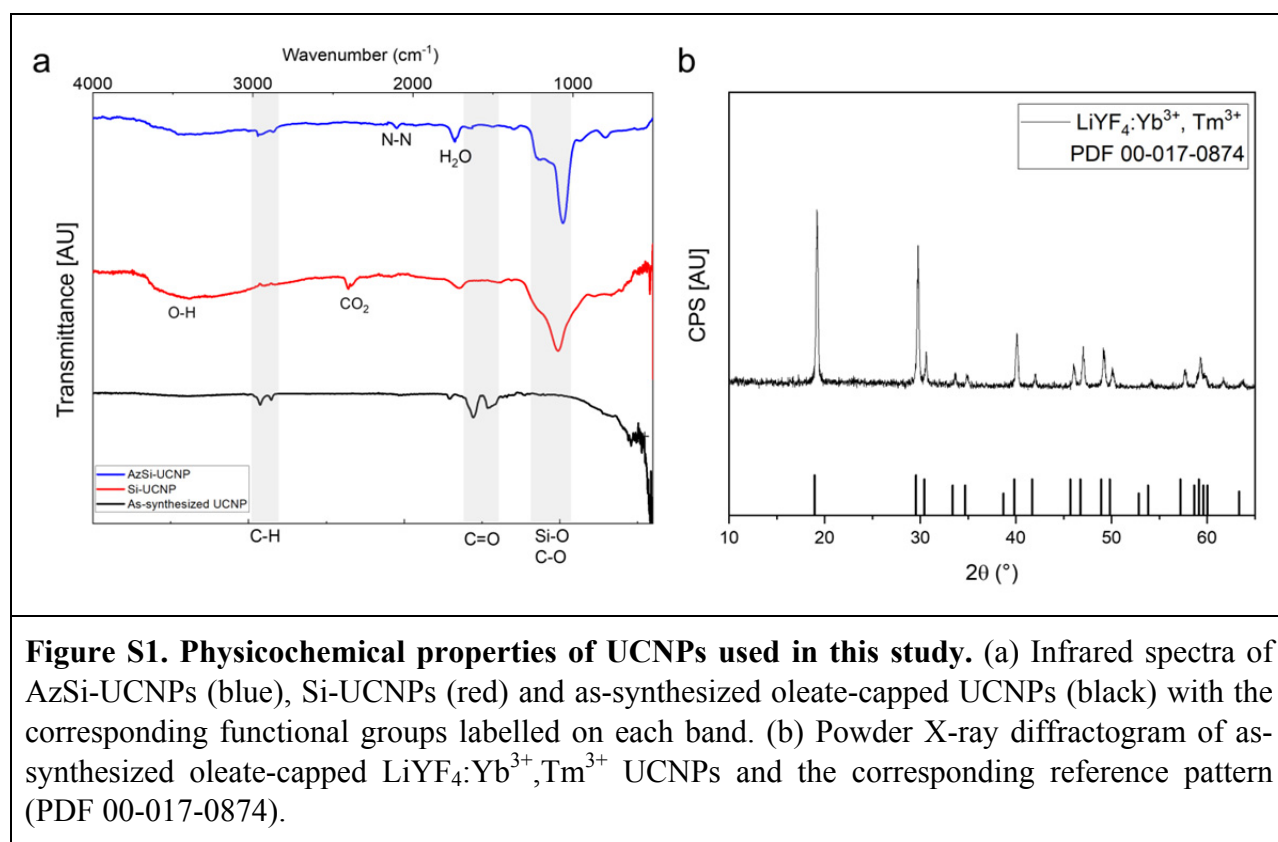

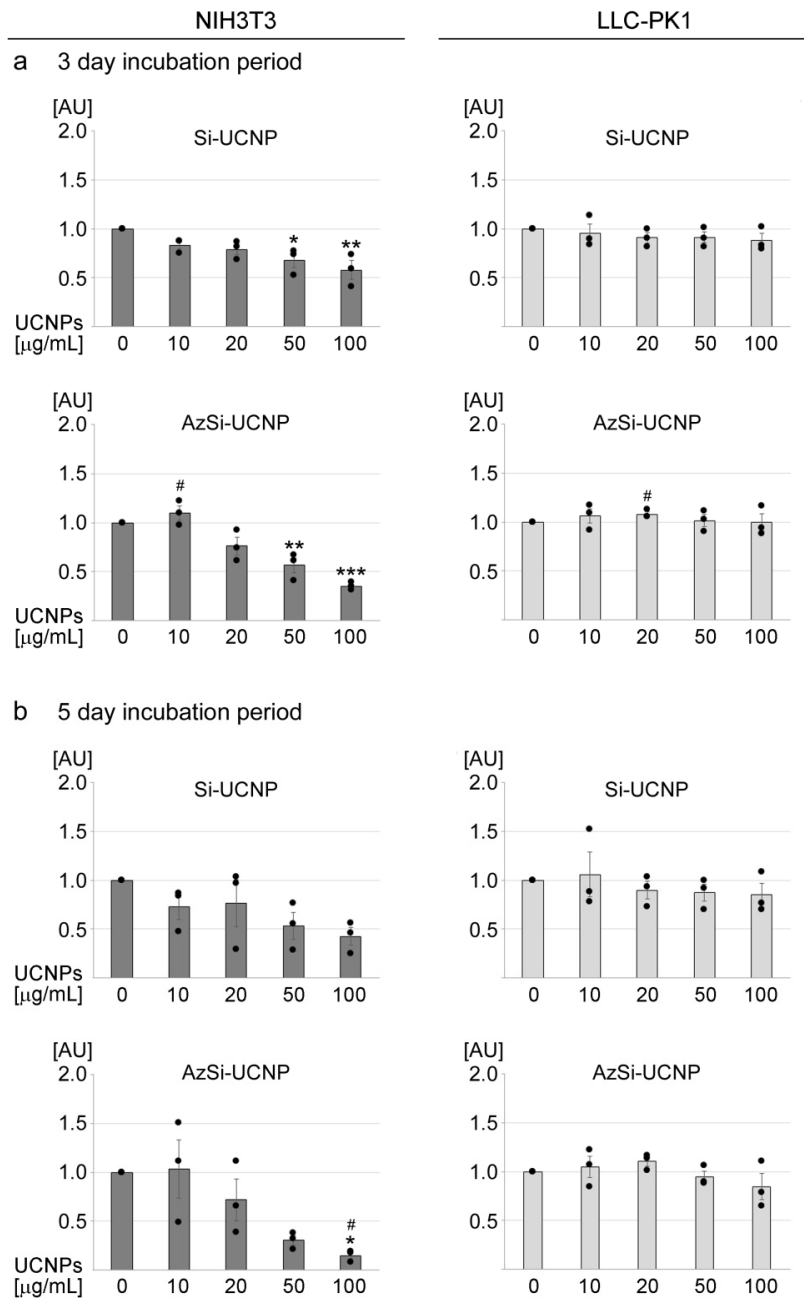

**Figure S2. Cell viability after incubation with UCNPs for 3 and 5 days.** Prolonged exposure to UCNPs reduces the viability of NIH3T3 fibroblasts, but not of LLC-PK1 proximal tubule cells. Cells were incubated with Si-UCNPs or AzSi-UCNPs for (a) 3 days or (b) 5 days. Cell viability was determined as described for Fig. 3. One-way ANOVA combined with Bonferroni correction identified significant differences between the control [0 μg/ml] and UCNP-treated samples for each experimental group; \*,  $p < 0.05$ ; \*\*,  $p < 0.01$ ; \*\*\*,  $p < 0.001$ . Student's t-test was applied for pairwise comparisons between samples incubated with Si-UCNPs and AzSi-UCNPs; #,  $p < 0.05$ . AU, arbitrary units.

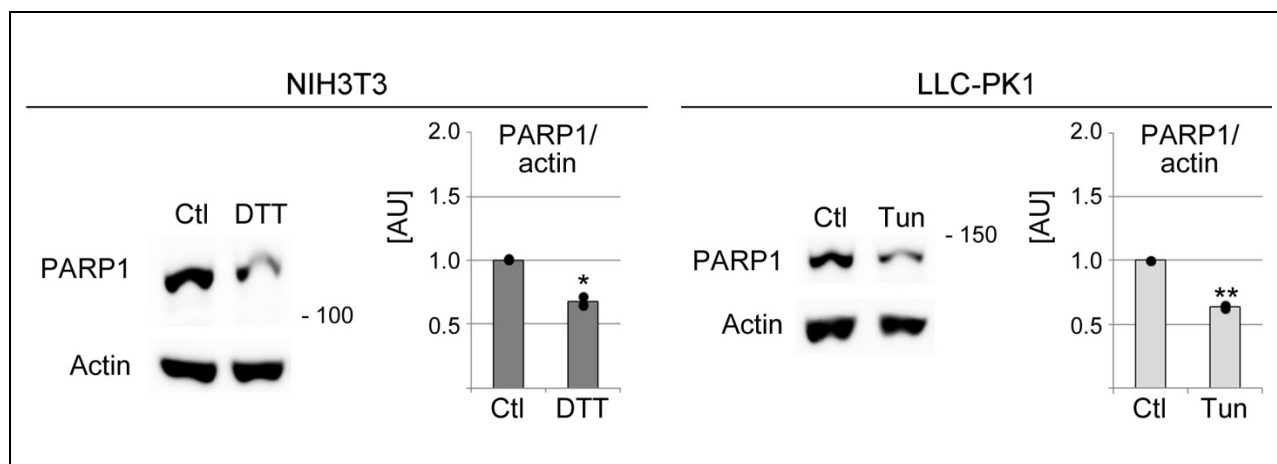

**Figure S3. Loss of PARP1 following endoplasmic reticulum stress.** NIH3T3 fibroblasts and LLC-PK1 cells were incubated with DTT or tunicamycin (Tun) to trigger an ER stress response. Changes in PARP1 abundance were determined by Western blotting. Molecular masses of marker proteins in kD are depicted at the right margins of the blots. Graphs show results for two independent experiments. Student's t-test was used for pairwise comparisons between vehicle controls (Ctl) and treated samples; \*,  $p < 0.05$ ; \*\*,  $p < 0.01$ . AU, arbitrary units.

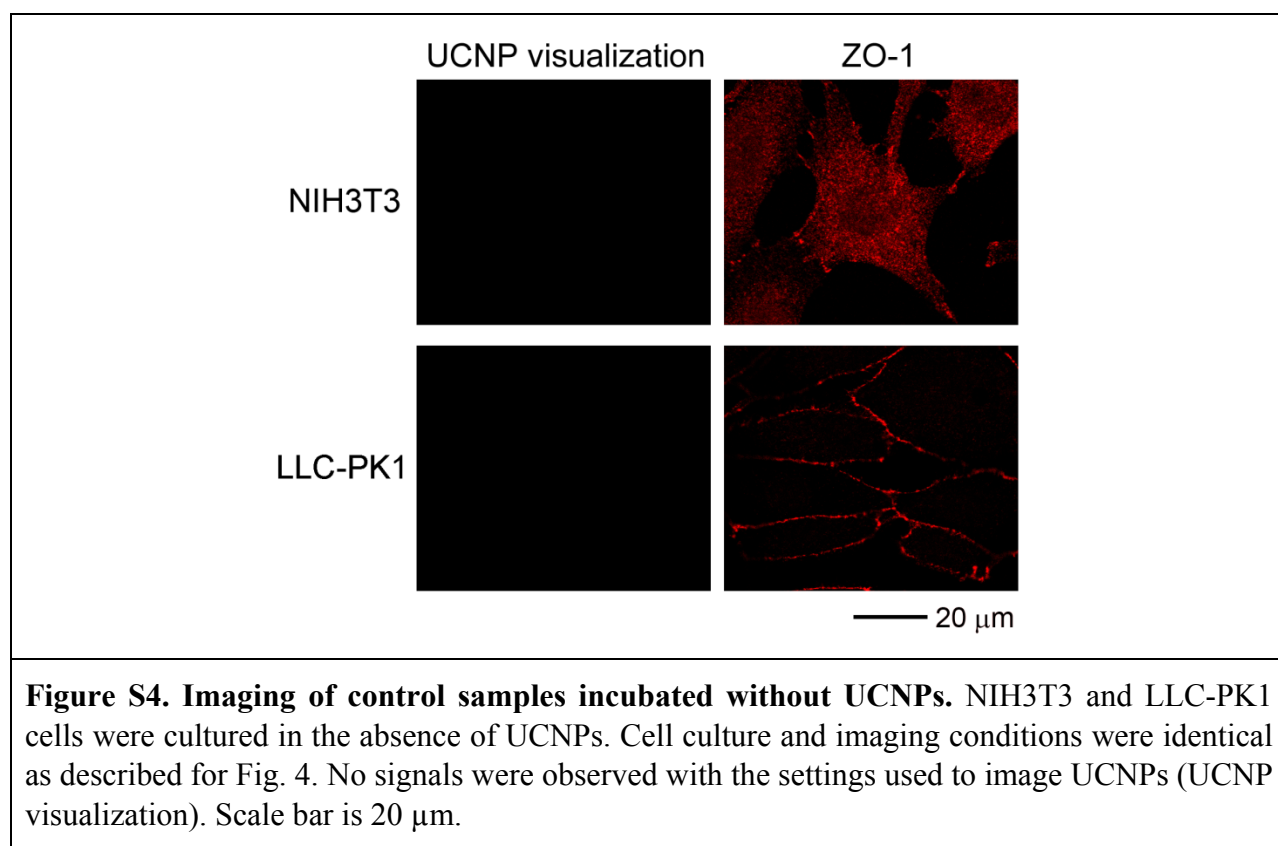

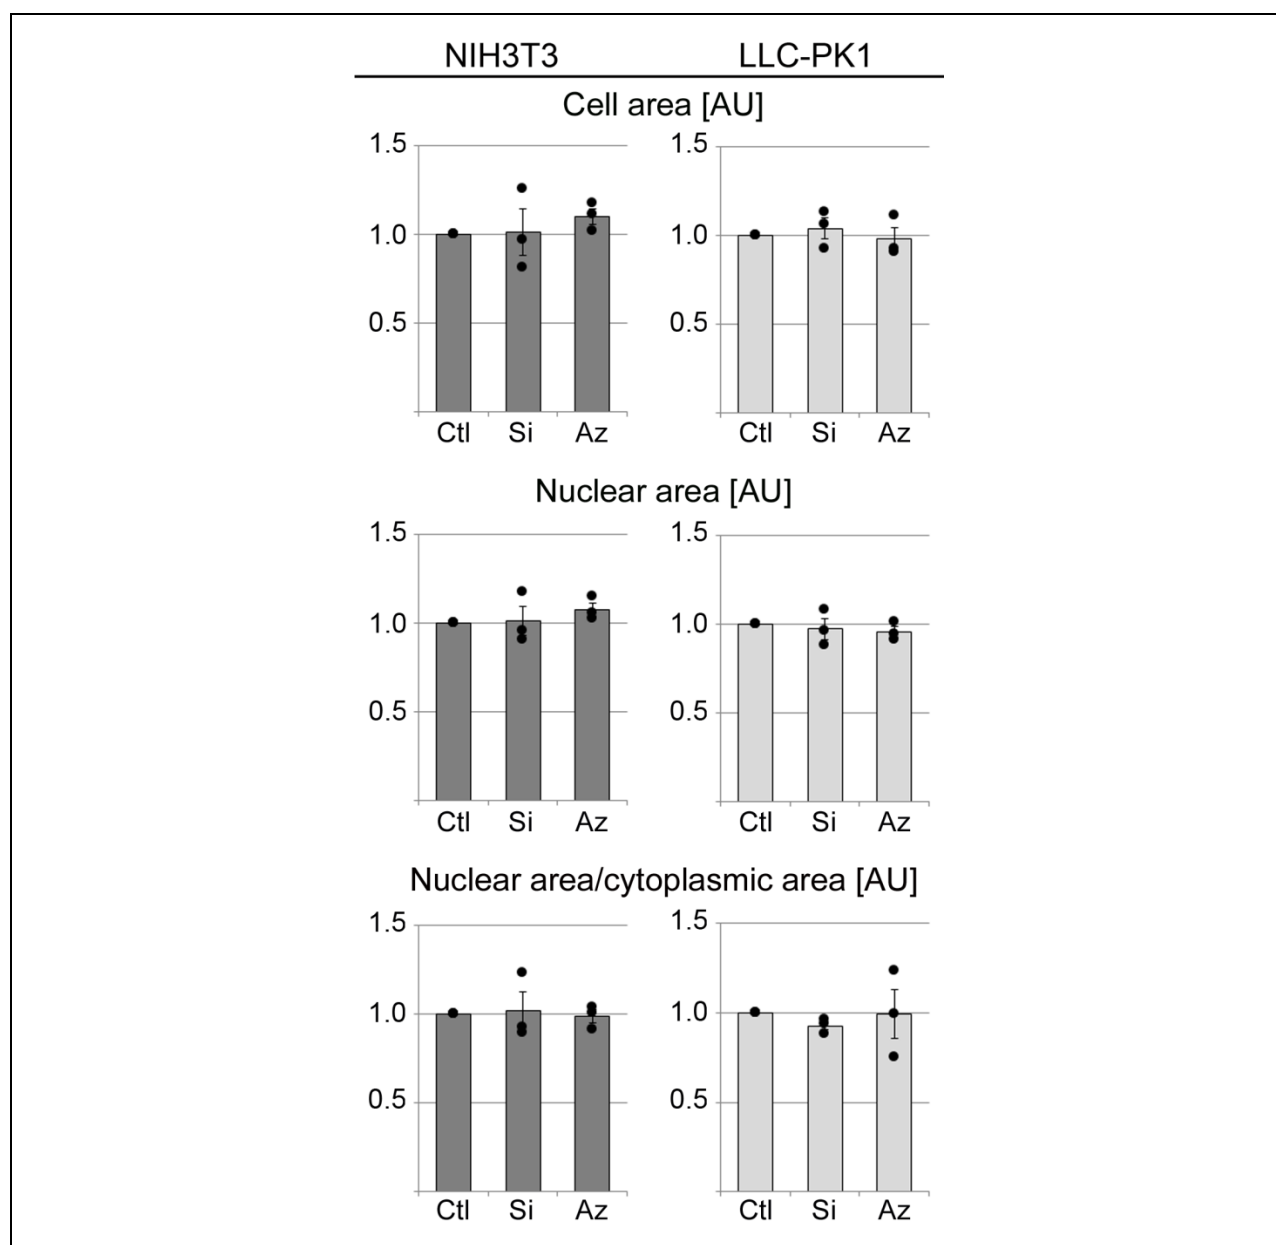

**Figure S5. Impact of UCNPS on cell area, nuclear area, and the ratio nuclear area/cytoplasmic area.** NIH3T3 or LLC-PK1 cells were treated for 24 hours with vehicle, 100  $\mu\text{g/mL}$  Si-UCNPs or AzSi-UCNPs. Samples were fixed and processed for immunostaining. The size of cells and nuclei was quantified for three independent experiments. For each experiment, at least 30 cells were evaluated per condition. Results were normalized to vehicle controls. The graphs show averages  $\pm$  SEM for the cell size, nuclear size, or the ratio of nuclear/cytoplasmic areas. UCNPs did not cause significant changes for any of these parameters. AU, arbitrary units.

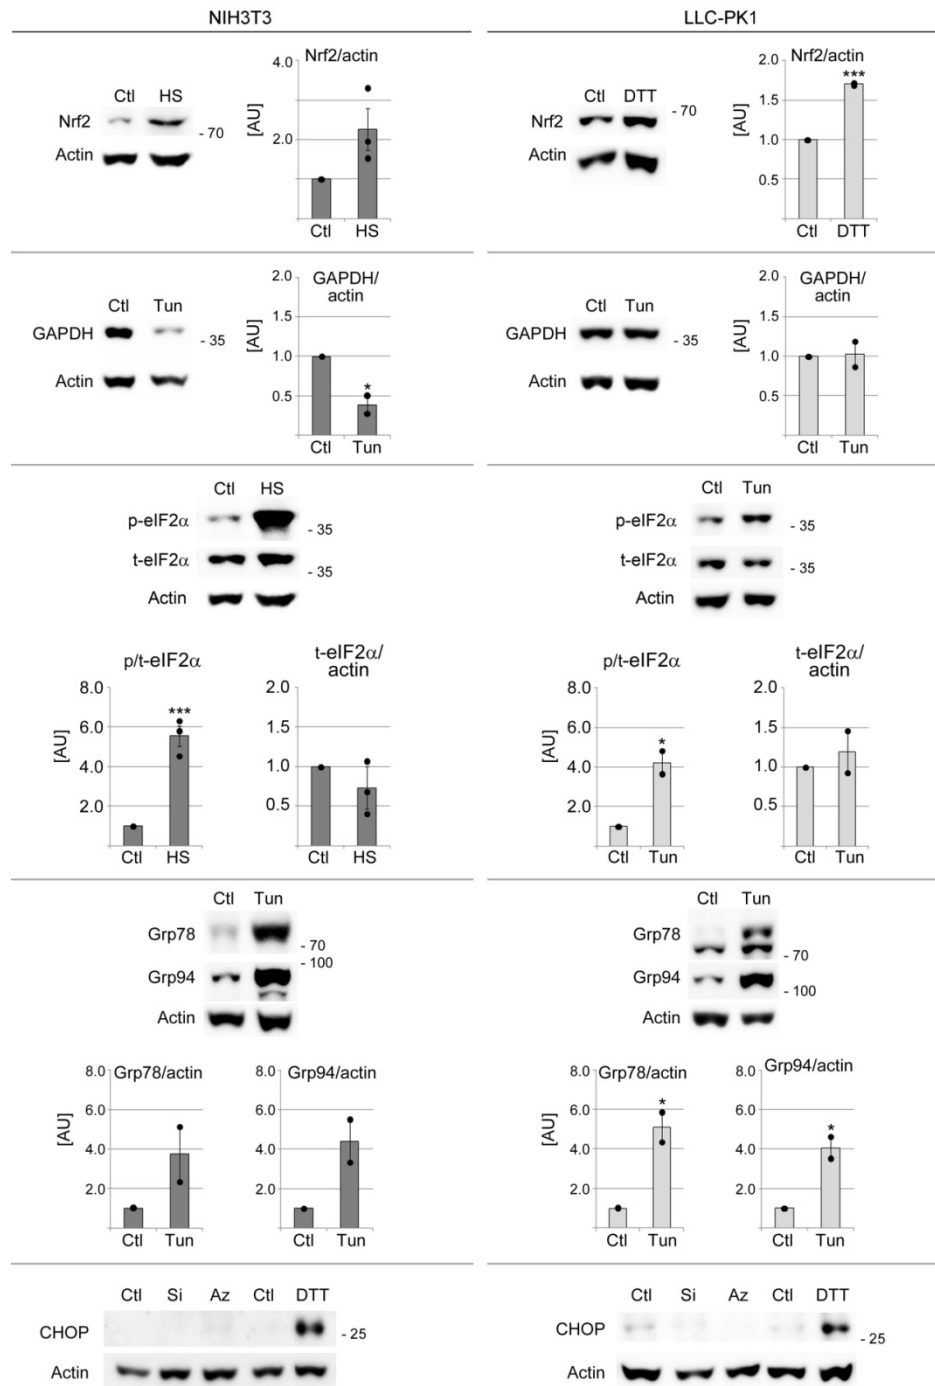

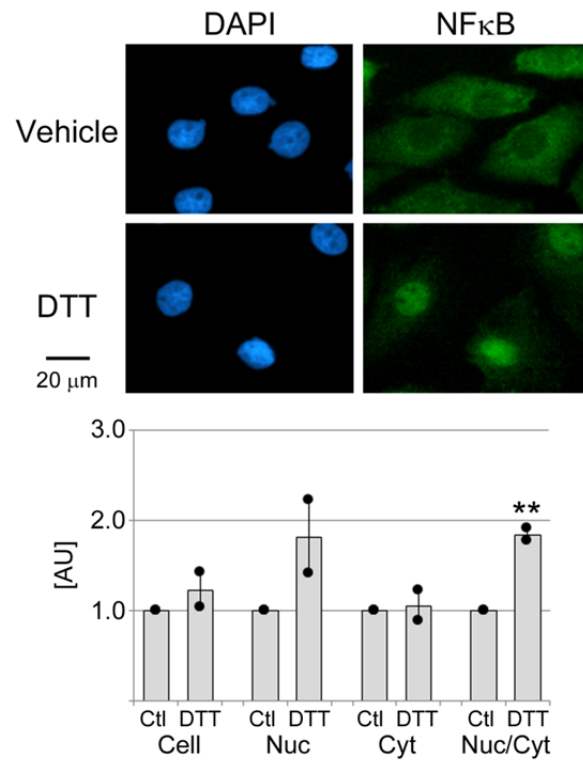

**Figure S7. NFκB accumulation in the nuclei of DTT-treated LLC-PK1 cells.** LLC-PK1 cells were incubated with vehicle or DTT as described in Materials and Methods. Following immunostaining, the subcellular localization of NFκB was determined for at least 29 cells per condition for each experiment. Results for two independent experiments are shown as average  $\pm$  SEM. Student's t-test uncovered a significant increase of the nuc/cyt ratio for DTT-treated cells; \*\*,  $p < 0.01$ . Scale bar is 20 μm. AU, arbitrary units.

## Raw data files for Western blots.

Raw data files for enhanced chemiluminescence are depicted below. Black bars on top of the blots identify the lanes that are shown in the figures. For some of the raw data files, the position of the protein of interest is indicated with an arrowhead. Alternatively, the name of the protein is depicted at the margin of the blot. Original blots are shown side-by-side for NIH3T3 and LLC-PK1 cells.

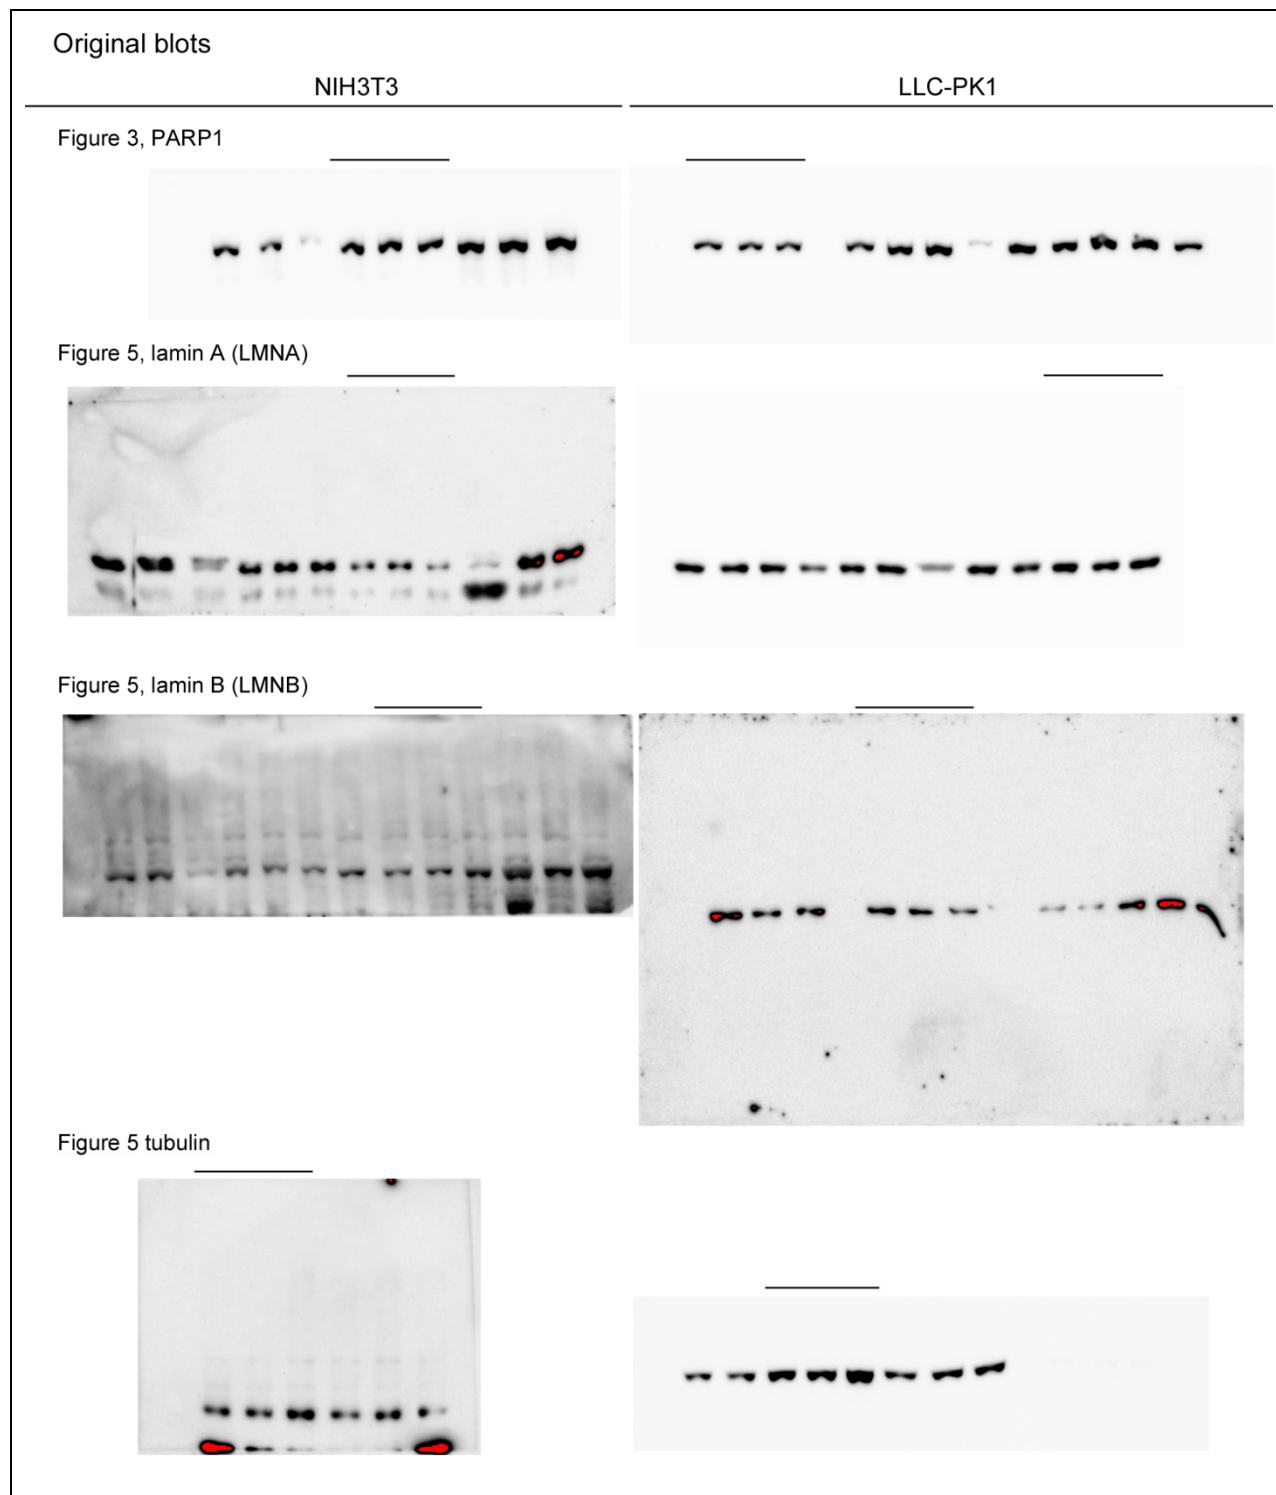

Original blots

NIH3T3

LLC-PK1

Figure 6, Nrf2

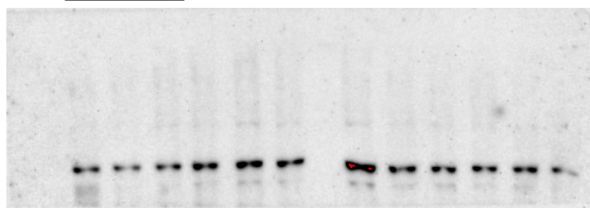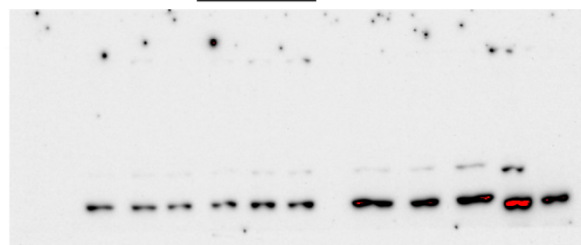

Figure 6, NFκB

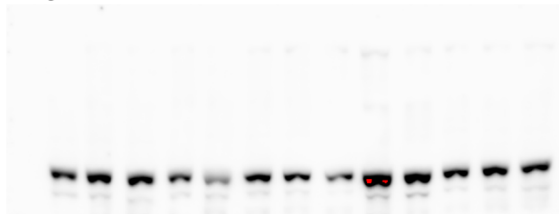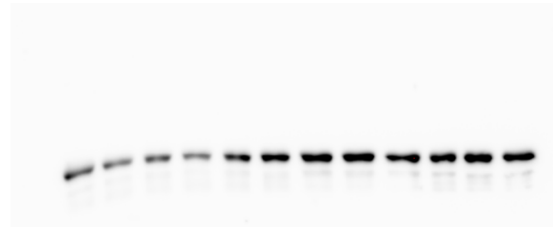

Figure 6, GAPDH

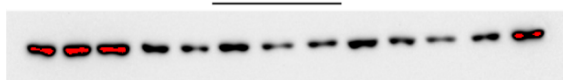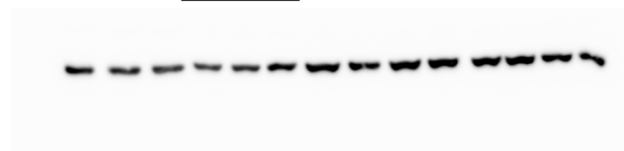

Original blots

NIH3T3

LLC-PK1

Figure 7, p53

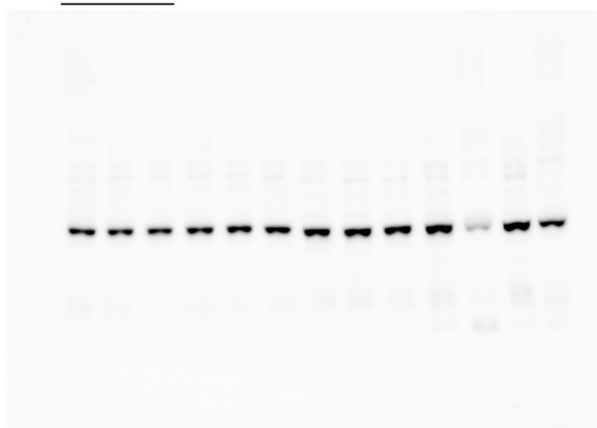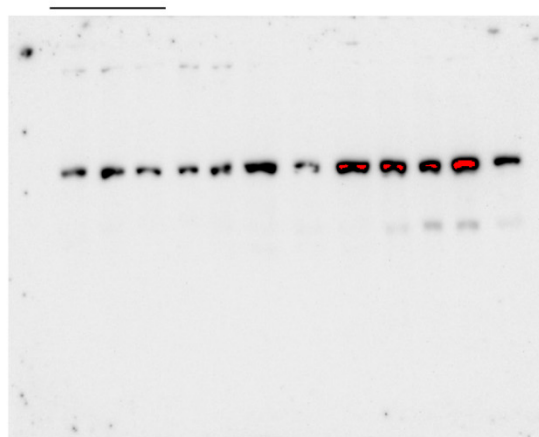

Figure 7, RPA194

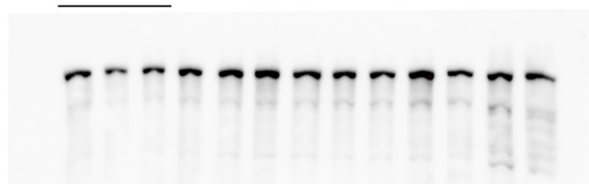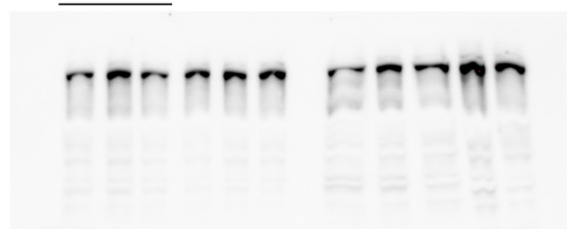

Figure 7, Fibrillarin

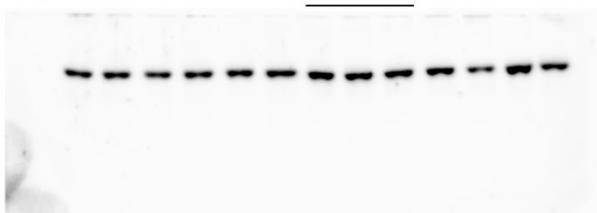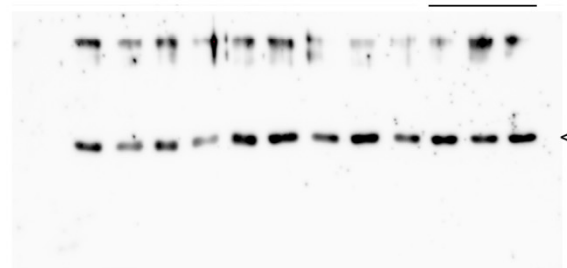

Figure 7, Nucleolin

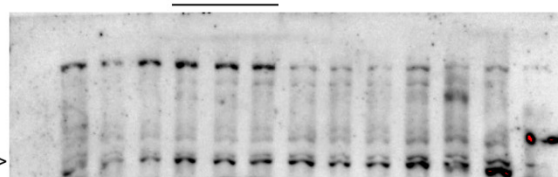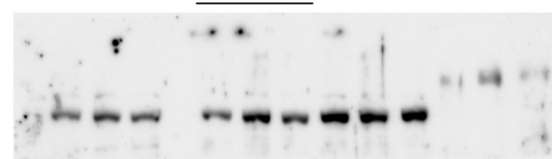

Original blots

NIH3T3

LLC-PK1

Figure 8, p-eIF2 $\alpha$

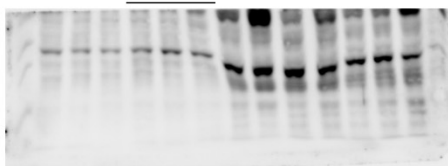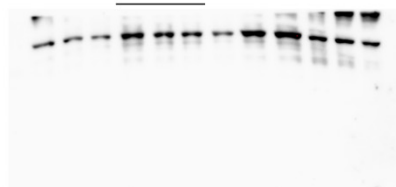

Figure 8, t-eIF2 $\alpha$

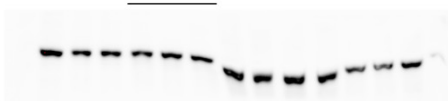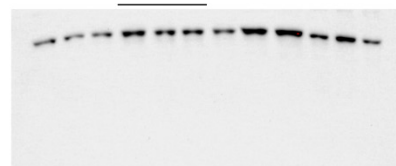

Figure 8, Grp78

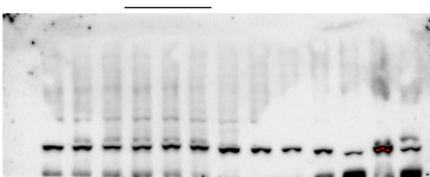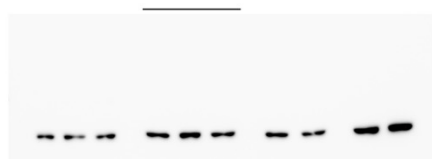

Figure 8, Grp94

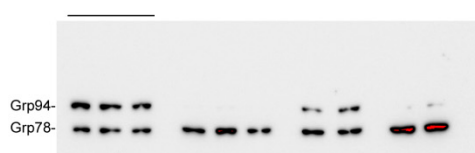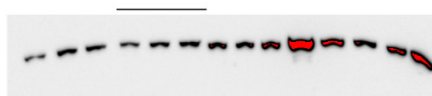

Figure 8, Hsp70

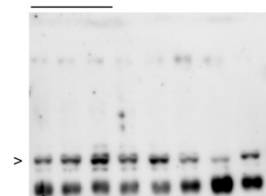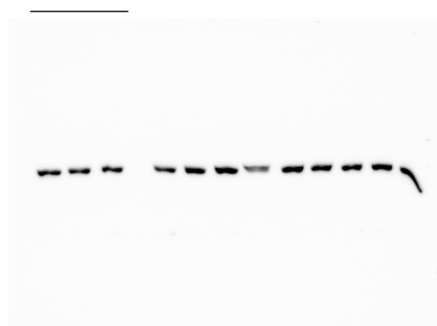

Figure 8, Hsp90

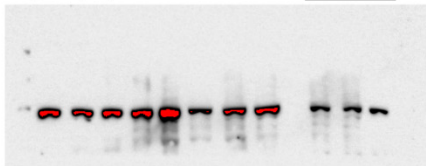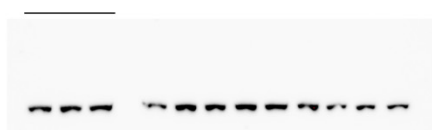

Figure 8, VCP

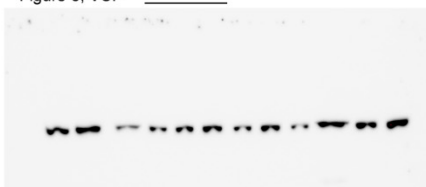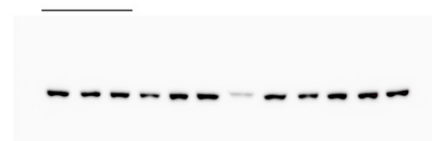

Original blots

NIH3T3

LLC-PK1

Figure S3, PARP1

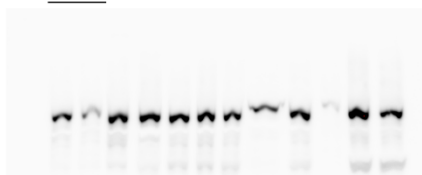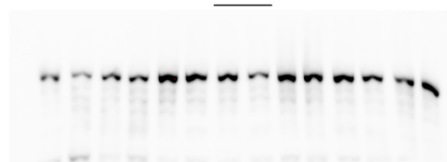

Figure S6, Nrf2

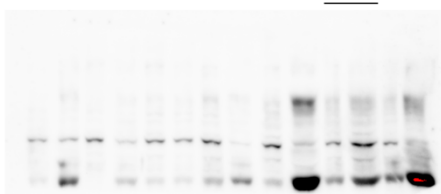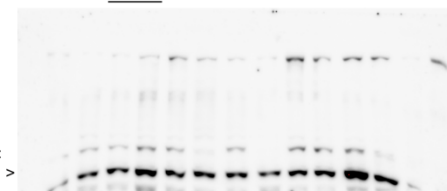

Figure S6, GAPDH

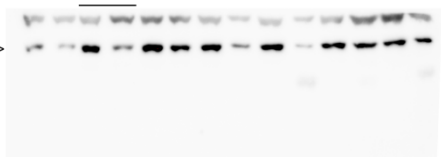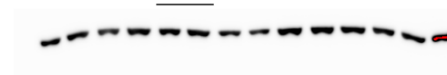

Figure S6, p-eIF2 $\alpha$

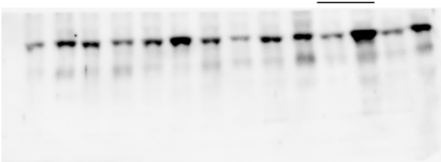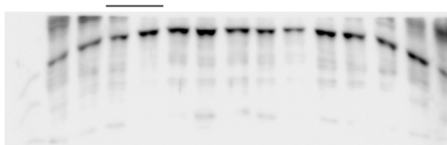

Figure S6, t-eIF2 $\alpha$

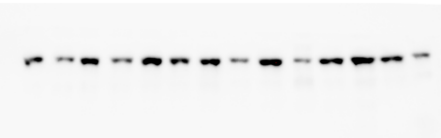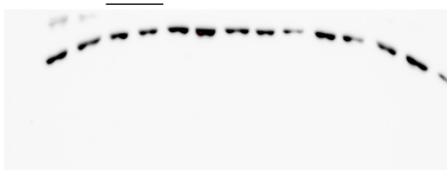

Figure S6, Grp78

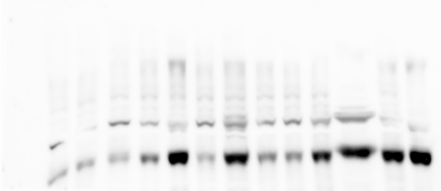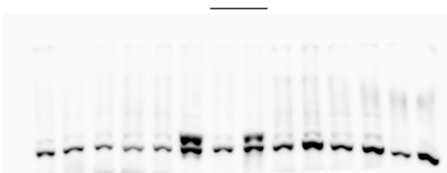

Figure S6, Grp94

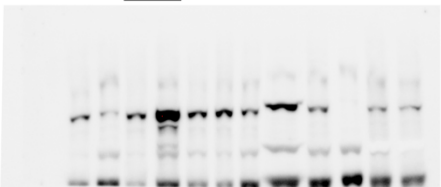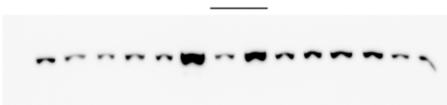

Figure S6, CHOP

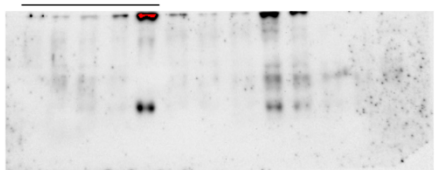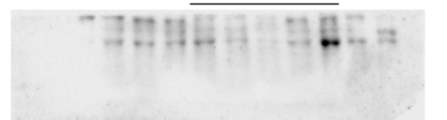

Supplement: d3ra08869c1.pdf [file d3ra08869c1.pdf]
